# Supplementary material for: CdS-carbon black hybrid nanocomposite buffer layer for antimony sulfide solar cells
Source: Royal Society of Chemistry journal article supplement (doi:10.1039/d3lf00235g), 2024-01-01
Supplement: d3lf00235g1.pdf [file d3lf00235g1.pdf]

## Supplementary material

### CdS-carbon black hybrid nanocomposite buffer layer for antimony sulfide solar cells

Ronal Edgardo Castellanos-Pineda, Agustin Baron-Jaimes, Mario Alejandro Millán-Franco, Marina Elizabeth Rincón and Oscar Andrés Jaramillo-Quintero\*

*Instituto de Energías Renovables, Universidad Nacional Autónoma de México, Privada Xochicalco S/N, C.P. 62580 Temixco, Mor., México.*

\*E-mail address: oajaq@ier.unam.mx

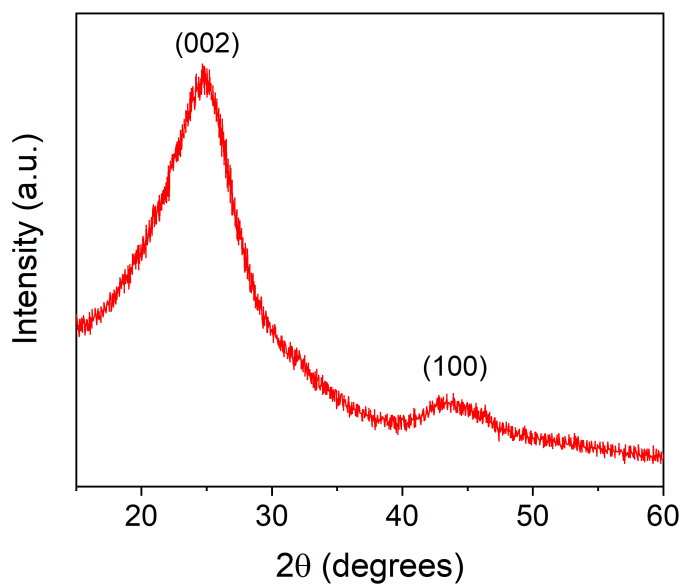

**Figure S1.** XRD pattern of the pristine CB powder.

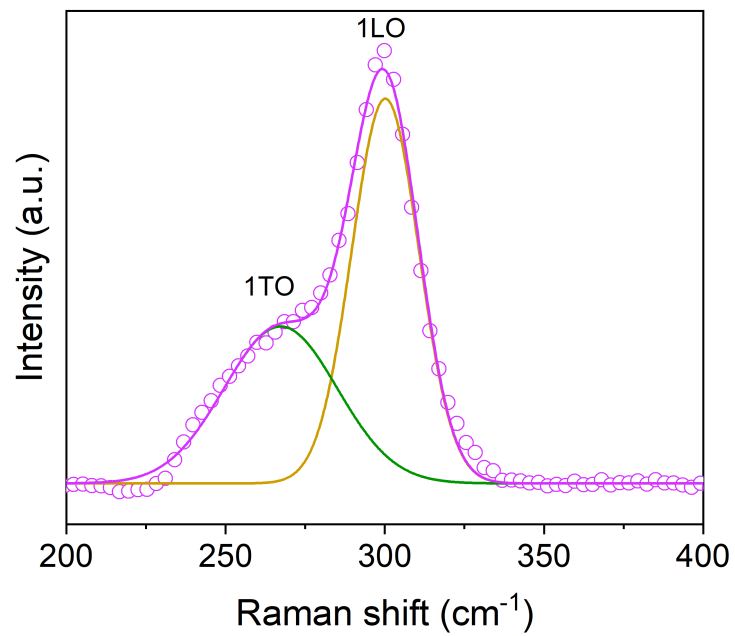

**Figure S2.** Fitting of the main Raman band, indicating the longitudinal optical (1LO) and transverse optical (1TO) mode.

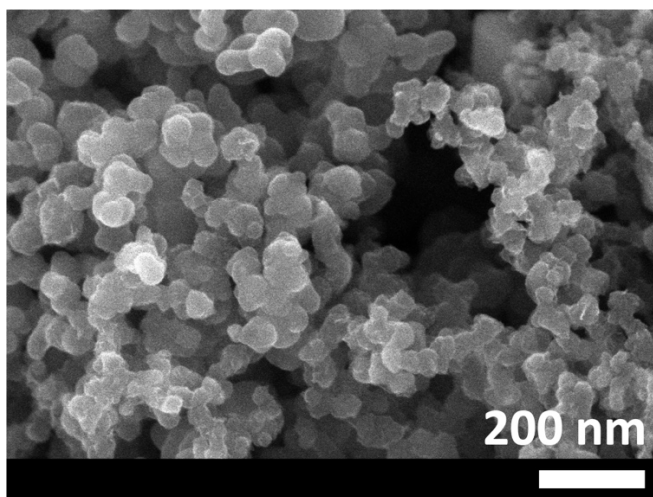

**Figure S3.** Representative SEM image of CB nanoparticles.

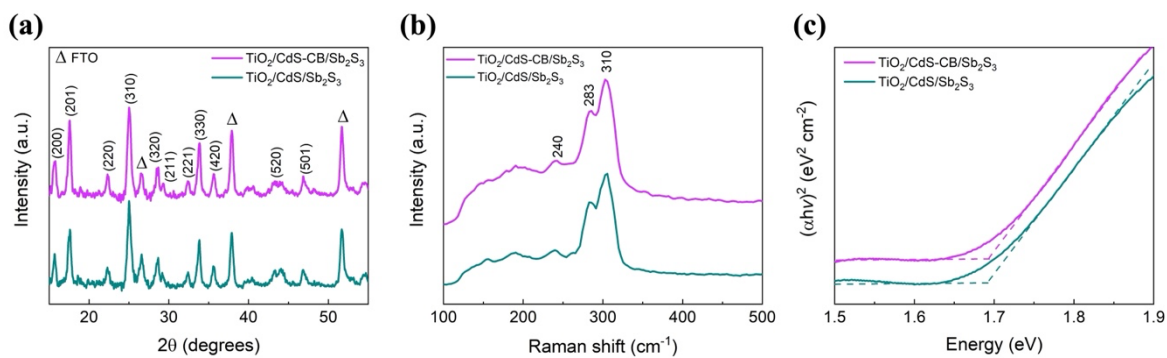

**Figure S4.** (a) XRD patterns, (b) Raman spectra and (c) Tauc plots of the Sb<sub>2</sub>S<sub>3</sub> films deposited on CdS and CdS-CB films.

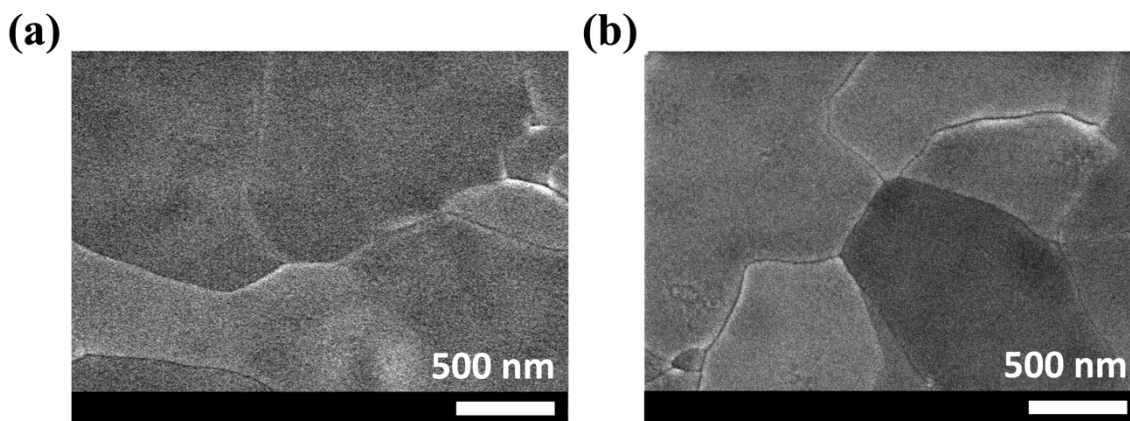

**Figure S5.** Top-view SEM images of the Sb<sub>2</sub>S<sub>3</sub> film deposited on (a) TiO<sub>2</sub>/CdS and (b) TiO<sub>2</sub>/CdS-CB substrates.

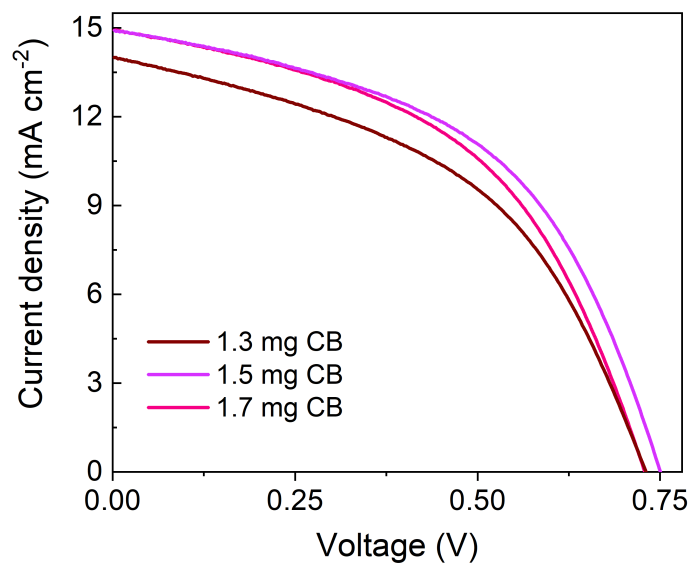

**Figure S6.**  $J$ - $V$  curves of the CdSC-SC devices fabricated with different concentrations of CB.

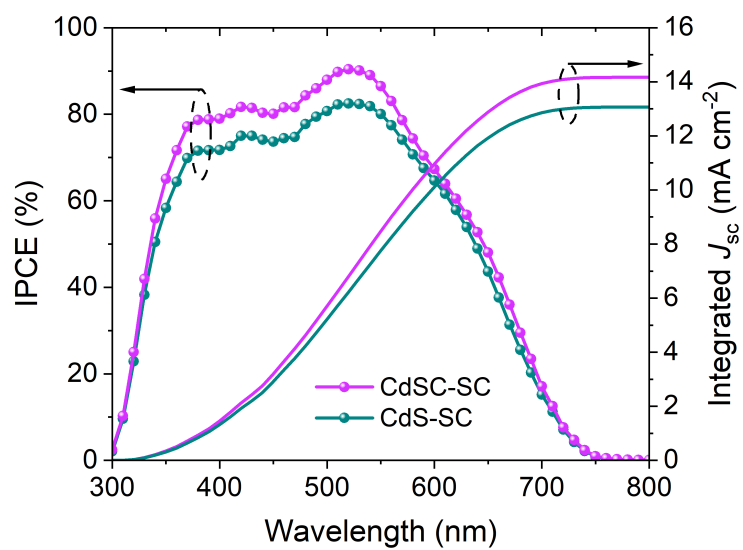

**Figure S7.** IPCE spectra and integrated  $J_{sc}$  of the champion CdS-SC and CdSC-SC devices.

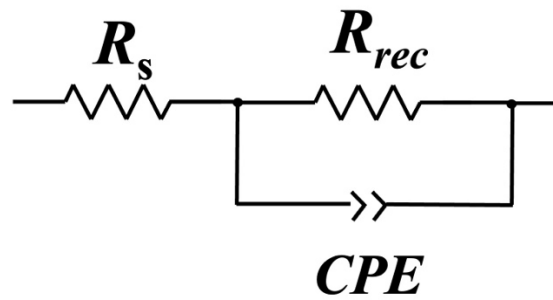

**Figure S8.** Equivalent circuit model for EIS analysis.

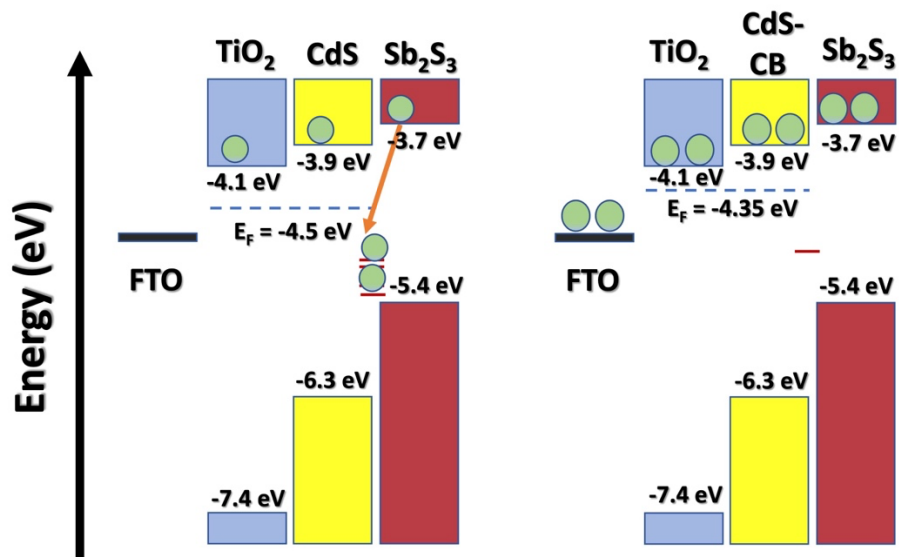

**Figure S9.** Energy level diagram of the CdS-SC and CdSC-SC devices. The green circles represent photogenerated electrons, whereas the red lines represent trap states.

**Table S1.** Photovoltaic parameters of the best-performing CdSC-SC devices with different concentrations of CB.

| Device    | $J_{sc}$ (mA cm <sup>-2</sup> ) | $V_{oc}$ (V) | Fill factor (%) | PCE (%) |
|-----------|---------------------------------|--------------|-----------------|---------|
| 1.3 mg CB | 14.05                           | 0.73         | 50.72           | 5.18    |
| 1.5mg CB  | 14.92                           | 0.75         | 53.81           | 6.03    |
| 1.7 mg CB | 15.01                           | 0.73         | 51.25           | 5.58    |

**Table S2.** Comparison of planar Sb<sub>2</sub>S<sub>3</sub> solar cells based on different interfacial layers and this work.

| Configuration                                                               | $J_{sc}$ (mA cm <sup>-2</sup> ) | $V_{oc}$ (V) | FF (%) | PCE (%) | Ref       |
|-----------------------------------------------------------------------------|---------------------------------|--------------|--------|---------|-----------|
| FTO/TiO <sub>2</sub> /CdS/Sb <sub>2</sub> S <sub>3</sub> /spiro-OMeTAD/Au   | 15.1                            | 0.76         | 56.0   | 6.40    | [S1]      |
| ITO/TiO <sub>2</sub> /CdS/Sb <sub>2</sub> S <sub>3</sub> /C/Ag              | 17.12                           | 0.72         | 58.8   | 7.23    | [S2]      |
| FTO/TiO <sub>2</sub> /CdS/Sb <sub>2</sub> S <sub>3</sub> /Au                | 16.09                           | 0.69         | 38.09  | 4.23    | [S3]      |
| FTO/TiO <sub>2</sub> /CdS/Sb <sub>2</sub> S <sub>3</sub> /spiro-MeOTAD/Au   | 19.61                           | 0.66         | 47.03  | 5.59    | [S4]      |
| FTO/TiO <sub>2</sub> /CdS/Sb <sub>2</sub> S <sub>3</sub> /spiro-MeOTAD/Au   | 16.27                           | 0.68         | 53.00  | 5.86    | [S5]      |
| FTO/TiO <sub>2</sub> /CdS-C/Sb <sub>2</sub> S <sub>3</sub> /spiro-MeOTAD/Au | 14.92                           | 0.75         | 53.81  | 6.03    | This work |

## References

- [S1] X. Jin, Y. Fang, T. Salim, M. Feng, S. Hadke, S. W. Leow, T. C. Sum and L. H. Wong, *Adv. Funct. Mater.*, 2020, **30**, 2002887.
- [S2] L.-Q. Yao, L.-M. Lin, Z.-P. Huang, Y. Mao, H. Li, W.-W. Lin, S.-Y. Chen, Z.-G. Huang, J.-M. Li and G.-L. Chen, *Nano Energy*, 2023, **106**, 108064.
- [S3] P. S. Pawar, R. Nandi, K. R. E. Neerugatti, I. Sharma, R. K. Yadav, Y. T. Kim, J. Y. Cho and J. Heo, *Sol. Energy*, 2022, **246**, 141-151.

[S4] Z. Feng, S. Sun, Y. Sun, X. Liu, H. Liu and H. Liu, *Appl. Phys. A*, 2022, **128**, 479.

[S5] Y. A. Alarcón-Altamirano, R. A. Miranda-Gamboa, A. Baron-Jaimes, K. A. Ortiz-Soto, M. E.

Rincon and O. A. Jaramillo-Quintero, *Nanotechnology*, 2022, **33**, 445401.
